# Supplementary material for: Accuracy of Prospective Predictions of 30-Day Hospital Readmission
Source: Atypon-hosted journal article supplement (doi:10.1176/appi.ps.201400282), 2015-11-02
Supplement: appi.ps.201400282.ds001.pdf [file appi.ps.201400282.ds001.pdf]

**Appendix 1: Sensitivity/Specificity for Predictions based on Alternate Cut-Offs of Case Manager Concern**

| <b>Case manager level of concern</b> |          |          |          |          |          |              |
|--------------------------------------|----------|----------|----------|----------|----------|--------------|
| <b>30-Day readmission?</b>           | <b>1</b> | <b>2</b> | <b>3</b> | <b>4</b> | <b>5</b> | <b>Total</b> |
| <b>No</b>                            | 33       | 62       | 104      | 41       | 14       | 254          |
| <b>Row %</b>                         | 13.0     | 24.4     | 40.9     | 16.1     | 5.5      | 90.1         |
| <b>Yes</b>                           | 1        | 3        | 13       | 8        | 3        | 28           |
| <b>Row %</b>                         | 3.6      | 10.7     | 46.4     | 28.6     | 10.7     | 9.9          |
| <b>Total</b>                         | 34       | 65       | 117      | 49       | 17       | 282          |
| <b>Row %</b>                         | 12.1     | 23.0     | 41.5     | 17.4     | 6.0      | 100.0        |

| <b>Accuracy Statistics</b> | <b>If concern cut-off:</b> |           |
|----------------------------|----------------------------|-----------|
|                            | <b>≥3</b>                  | <b>≥4</b> |
| Sensitivity                | 85.7                       | 39.3      |
| Specificity                | 37.4                       | 78.3      |
| False positive Rate        | 86.9                       | 83.3      |
| Positive Predictive Value  | 13.1                       | 16.7      |
